# Supplementary material for: Influence of Aerosolization on Endothelial Cells for Efficient Cell Deposition in Biohybrid and Regenerative Applications
Source: MDPI journal article supplement (doi:10.3390/mi14030575), 2023-02-28
Supplement: s1 [file s1]

# Influence of Aerosolization on Endothelial Cells for Efficient Cell Deposition in Biohybrid and Regenerative Applications

Maria Cheremkhina <sup>1,2,†</sup>, Sarah Klein <sup>1,2,†</sup>, Aaron Babendreyer <sup>3</sup>, Andreas Ludwig <sup>3</sup>, Thomas Schmitz-Rode <sup>1</sup>, Stefan Jockenhoevel <sup>1,2,\*</sup>, Christian G. Cornelissen <sup>1,4</sup> and Anja Lena Thiebes <sup>1,2,\*</sup>

<sup>1</sup> Department of Biohybrid & Medical Textiles (BioTex), Institute of Applied Medical Engineering, Helmholtz Institute Aachen, RWTH Aachen University, Forckenbeckstraße 55, 52074 Aachen, Germany

<sup>2</sup> Aachen-Maastricht Institute for Biobased Materials, Faculty of Science and Engineering, Maastricht University, Brightlands Chemelot Campus, 6167 RD, Geleen, The Netherlands

<sup>3</sup> Institute of Molecular Pharmacology, University Hospital RWTH Aachen, Wendlingweg 2, 52074 Aachen, Germany

<sup>4</sup> Department of Pneumology and Internal Intensive Care Medicine, Medical Clinic V, University Hospital RWTH Aachen, Pauwelsstraße 30, 52074 Aachen, Germany

\* Correspondence: jockenhoevel@ame.rwth-aachen.de (S.J.); thiebes@ame.rwth-aachen.de (A.L.T.); Tel.: +49-241-80-47478 (S.J.); +49-241-80-47472 (A.L.T.)

† These authors contributed equally to this work.

**Table S1.** Used qPCR primers and their annealing temperature.

| Gene        | Sequence                                                            | Annealing temperature |
|-------------|---------------------------------------------------------------------|-----------------------|
| EDN1        | forward: CCTAAGACAAACCAGGTCGG<br>reverse: CTTTGCCAGTCAGGAACCA       | 60 °C                 |
| GAPDH       | forward: CGGGGCTCTCCAGAACATCATCC<br>reverse: CCAGCCCCAGCGTCAAAGGTG  | 66 °C                 |
| HMOX1 (HO1) | forward: CAGTGCCACCAAGTTCAAGC<br>reverse: GTTGAGCAGGAACGCAGTCTT     | 63 °C                 |
| CXCL8 (IL8) | forward: GACATACTCCAAACCTTTCC<br>reverse: AACTTCTCCACAACCCCTC       | 60 °C                 |
| KLF2        | forward: AAAGACCACGATCCTCCT<br>reverse: CTTATTTCTCACAAGGCATCAC      | 59 °C                 |
| MCP1        | forward: ATGAAAGTCTCTGCCGCC<br>reverse: CTTCTTTGGGACACTTGCT         | 57 °C                 |
| NOS3        | forward: CGAGTGAACGCGACAATCCT<br>reverse: GCTGCAAAGCTCTCTCCATTC     | 60 °C                 |
| NQO1        | forward: CGTCCTTCAACTATGCCA<br>reverse: TTTACCTGTGATGTCCTTTCTG      | 57 °C                 |
| TBP         | forward: GAGCCAAGAGTGAAGAACAGTC<br>reverse: GCTCCCCACCATATTCTGAATCT | 60 °C                 |
| THBD (TM)   | forward: AGAGAAGAGACAAACACCT<br>reverse: TCCACAAGACCAGTAGAG         | 57 °C                 |
| PLAT (TPA)  | forward: TGCTACTTTGGGAATGGG<br>reverse: GTTCTGTGCTGTGTAAACCT        | 57 °C                 |
| VCAM1       | forward: GCAAGTCTACATATCACCC<br>reverse: AATCTTCCATCCTCATAGCA       | 57 °C                 |

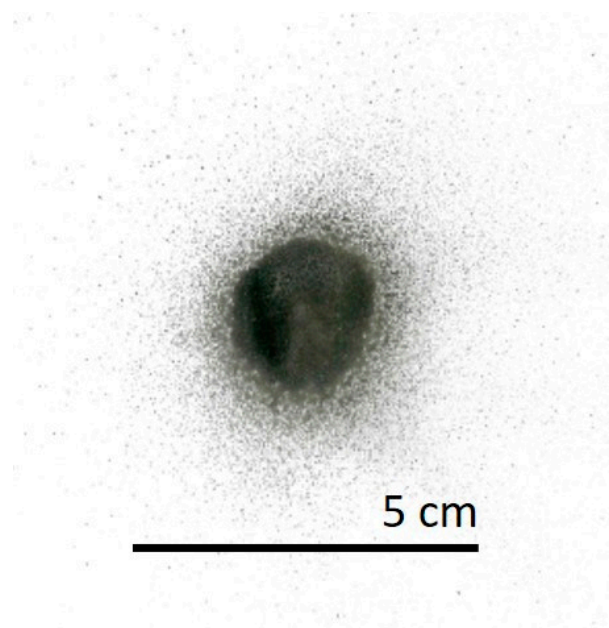

**Figure S1.** Representative picture of a spray pattern. Following parameters have been used: high flow rate, working distance – 9 cm.

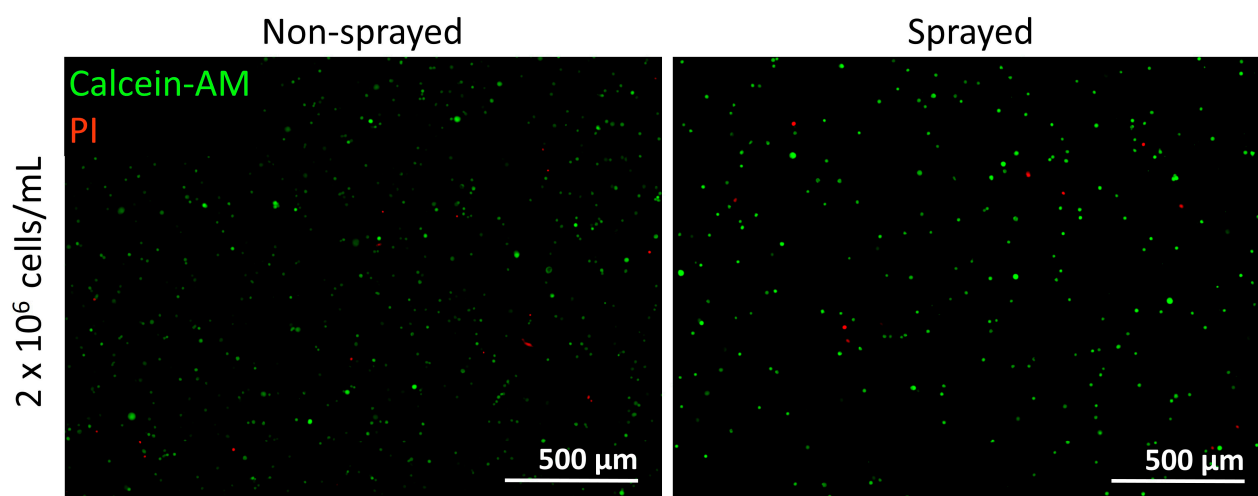

**Figure S2.** Representative pictures of the Calcein-AM (green) and PI (red) staining for the evaluation of cell survival. Sprayed cell (right) have been aerosolized with following parameters: high flow rate, working distance – 9 cm, cell concentration –  $2 \times 10^6$  cells/mL.
